# Supplementary material for: Strong Genetic Influence on a UK Nationwide Test of Educational Achievement at the End of Compulsory Education at Age 16
Source: PLOS journal article supplement (doi:10.1371/journal.pone.0080341), 2013-12-11
Supplement: S1 (10.1371/journal.pone.0080341.s001) [file journal.pone.0080341.s001]

## Supplementary Online Material

### Contents:

- Table S1: Details of construction for each subject / composite assessed.
- Table S2: Correlation matrix (Pearson's  $r$ ) for all GCSE subjects in our dataset, excluding short-course GCSEs and subjects with sample sizes too small to analyse individually. Significance (2-tailed) and sample size ( $N$ ) is shown for each.
- Table S3: Correlation matrix (Pearson's  $r$ ) for GCSE subjects included in composites.
- Table S4: Sex limitation model fitting results (with 95% confidence intervals), showing A, C and E estimates separately for males and females.
- Tables S5-S11: Sex limitation sub-model comparisons.

**Table S1:** Construction of composites.

|                                     |                                                                                                    |
|-------------------------------------|----------------------------------------------------------------------------------------------------|
| Mean grade for GCSE passes          | All GCSE subjects in dataset, including those with sample sizes too small to analyse individually. |
| Number of GCSE passes at grade A*-C | All GCSE subjects in dataset, including those with sample sizes too small to analyse individually. |
| GCSE English mean grade             | Mean of: English language, English literature (whichever taken)                                    |
| GCSE science mean grade             | Mean of: science core, science additional, biology, chemistry, physics (whichever taken)           |
| Mathematics                         | Single GCSE; raw grade used                                                                        |
| GCSE core subjects mean grade       | Mean of: English composite, mathematics grade, science composite (requiring all three)             |
| GCSE humanities mean grade          | Mean of: media studies, history, religious education (RE), art, drama and music (whichever taken)  |

**Table S2:** Correlation matrix for all GCSE subjects (continues on next page).

|                    |                 | English Language | English Literature | Media Studies | Mathematics | Statistics | Science Core | Science Additional | Biology | Chemistry | Physics | History | Geography | RE   | French | German | Spanish | DT   | ICT  | Business Studies | Art and Design | PE   | Drama | Music |
|--------------------|-----------------|------------------|--------------------|---------------|-------------|------------|--------------|--------------------|---------|-----------|---------|---------|-----------|------|--------|--------|---------|------|------|------------------|----------------|------|-------|-------|
| English Language   | Correlation     | 1                | .800               | .609          | .691        | .646       | .659         | .631               | .646    | .633      | .631    | .729    | .733      | .683 | .666   | .634   | .673    | .611 | .496 | .609             | .551           | .546 | .563  | .526  |
|                    | Sig. (2-tailed) |                  | .000               | .000          | .000        | .000       | .000         | .000               | .000    | .000      | .000    | .000    | .000      | .000 | .000   | .000   | .000    | .000 | .000 | .000             | .000           | .000 | .000  | .000  |
|                    | N               | 5466             | 4791               | 461           | 5398        | 627        | 2890         | 2349               | 2159    | 2147      | 2142    | 2369    | 2082      | 2566 | 1884   | 780    | 731     | 2078 | 1166 | 775              | 1607           | 1325 | 692   | 562   |
| English Literature | Correlation     | .800             | 1                  | .549          | .618        | .597       | .601         | .586               | .601    | .599      | .595    | .696    | .697      | .638 | .633   | .619   | .621    | .599 | .478 | .601             | .520           | .500 | .549  | .535  |
|                    | Sig. (2-tailed) | .000             |                    | .000          | .000        | .000       | .000         | .000               | .000    | .000      | .000    | .000    | .000      | .000 | .000   | .000   | .000    | .000 | .000 | .000             | .000           | .000 | .000  | .000  |
|                    | N               | 4791             | 4832               | 366           | 4775        | 592        | 2513         | 2109               | 2065    | 2053      | 2047    | 2239    | 1933      | 2335 | 1818   | 754    | 689     | 1826 | 1034 | 711              | 1436           | 1162 | 631   | 541   |
| Media Studies      | Correlation     | .609             | .549               | 1             | .508        | .489       | .498         | .520               | .539    | .429      | .420    | .591    | .649      | .434 | .562   | .559   | .382    | .532 | .390 | .537             | .439           | .338 | .621  | .674  |
|                    | Sig. (2-tailed) | .000             | .000               |               | .000        | .000       | .000         | .000               | .000    | .000      | .000    | .000    | .000      | .000 | .000   | .000   | .011    | .000 | .000 | .000             | .000           | .001 | .000  | .000  |
|                    | N               | 461              | 366                | 467           | 455         | 57         | 298          | 239                | 125     | 124       | 124     | 145     | 120       | 188  | 109    | 57     | 44      | 150  | 104  | 71               | 128            | 96   | 73    | 33    |
| Mathematics        | Correlation     | .691             | .618               | .508          | 1           | .785       | .752         | .735               | .734    | .763      | .775    | .686    | .721      | .595 | .643   | .611   | .670    | .606 | .545 | .602             | .483           | .577 | .423  | .536  |
|                    | Sig. (2-tailed) | .000             | .000               | .000          |             | .000       | .000         | .000               | .000    | .000      | .000    | .000    | .000      | .000 | .000   | .000   | .000    | .000 | .000 | .000             | .000           | .000 | .000  | .000  |
|                    | N               | 5398             | 4775               | 455           | 5461        | 627        | 2889         | 2347               | 2157    | 2145      | 2139    | 2363    | 2080      | 2559 | 1878   | 783    | 727     | 2081 | 1162 | 773              | 1606           | 1320 | 691   | 567   |
| Statistics         | Correlation     | .646             | .597               | .489          | .785        | 1          | .675         | .661               | .700    | .669      | .688    | .625    | .653      | .614 | .611   | .597   | .630    | .605 | .580 | .600             | .447           | .425 | .133  | .548  |
|                    | Sig. (2-tailed) | .000             | .000               | .000          | .000        |            | .000         | .000               | .000    | .000      | .000    | .000    | .000      | .000 | .000   | .000   | .000    | .000 | .000 | .000             | .000           | .000 | .335  | .000  |
|                    | N               | 627              | 592                | 57            | 627         | 629        | 276          | 247                | 333     | 334       | 333     | 269     | 257       | 290  | 236    | 115    | 90      | 232  | 168  | 104              | 171            | 157  | 55    | 75    |
| Science Core       | Correlation     | .659             | .601               | .498          | .752        | .675       | 1            | .831               |         |           |         | .664    | .720      | .594 | .612   | .540   | .613    | .529 | .460 | .629             | .422           | .534 | .439  | .468  |
|                    | Sig. (2-tailed) | .000             | .000               | .000          | .000        | .000       |              | .000               |         |           |         | .000    | .000      | .000 | .000   | .000   | .000    | .000 | .000 | .000             | .000           | .000 | .000  | .000  |
|                    | N               | 2890             | 2513               | 298           | 2889        | 276        | 2931         | 2372               |         |           |         | 1199    | 1025      | 1369 | 855    | 337    | 345     | 1165 | 708  | 444              | 908            | 789  | 421   | 280   |
| Science Additional | Correlation     | .631             | .586               | .520          | .735        | .661       | .831         | 1                  |         |           |         | .650    | .699      | .568 | .651   | .600   | .622    | .550 | .444 | .550             | .449           | .523 | .428  | .505  |
|                    | Sig. (2-tailed) | .000             | .000               | .000          | .000        | .000       | .000         |                    |         |           |         | .000    | .000      | .000 | .000   | .000   | .000    | .000 | .000 | .000             | .000           | .000 | .000  | .000  |
|                    | N               | 2349             | 2109               | 239           | 2347        | 247        | 2372         | 2372               |         |           |         | 1018    | 883       | 1145 | 769    | 296    | 305     | 960  | 557  | 368              | 733            | 620  | 335   | 243   |
| Biology            | Correlation     | .646             | .601               | .539          | .734        | .700       |              |                    | 1       | .828      | .821    | .678    | .707      | .620 | .610   | .574   | .633    | .535 | .491 | .646             | .463           | .530 | .368  | .399  |
|                    | Sig. (2-tailed) | .000             | .000               | .000          | .000        | .000       |              |                    |         | .000      | .000    | .000    | .000      | .000 | .000   | .000   | .000    | .000 | .000 | .000             | .000           | .000 | .000  | .000  |
|                    | N               | 2159             | 2065               | 125           | 2157        | 333        |              |                    | 2174    | 2145      | 2137    | 1093    | 987       | 1046 | 989    | 427    | 368     | 773  | 426  | 300              | 598            | 470  | 228   | 270   |
| Chemistry          | Correlation     | .633             | .599               | .429          | .763        | .669       |              |                    | .828    | 1         | .834    | .681    | .690      | .609 | .637   | .544   | .616    | .548 | .479 | .612             | .471           | .541 | .321  | .402  |
|                    | Sig. (2-tailed) | .000             | .000               | .000          | .000        | .000       |              |                    | .000    |           | .000    | .000    | .000      | .000 | .000   | .000   | .000    | .000 | .000 | .000             | .000           | .000 | .000  | .000  |
|                    | N               | 2147             | 2053               | 124           | 2145        | 334        |              |                    | 2145    | 2162      | 2141    | 1091    | 985       | 1032 | 983    | 429    | 365     | 766  | 425  | 298              | 590            | 467  | 221   | 269   |
| Physics            | Correlation     | .631             | .595               | .420          | .775        | .688       |              |                    | .821    | .834      | 1       | .673    | .651      | .584 | .615   | .572   | .583    | .519 | .469 | .625             | .448           | .558 | .354  | .443  |
|                    | Sig. (2-tailed) | .000             | .000               | .000          | .000        | .000       |              |                    | .000    | .000      |         | .000    | .000      | .000 | .000   | .000   | .000    | .000 | .000 | .000             | .000           | .000 | .000  | .000  |
|                    | N               | 2142             | 2047               | 124           | 2139        | 333        |              |                    | 2137    | 2141      | 2157    | 1081    | 981       | 1035 | 977    | 428    | 366     | 766  | 423  | 294              | 585            | 467  | 226   | 269   |
| History            | Correlation     | .729             | .696               | .591          | .686        | .625       | .664         | .650               | .678    | .681      | .673    | 1       | .745      | .689 | .643   | .590   | .620    | .610 | .504 | .670             | .505           | .577 | .410  | .483  |
|                    | Sig. (2-tailed) | .000             | .000               | .000          | .000        | .000       | .000         | .000               | .000    | .000      | .000    |         | .000      | .000 | .000   | .000   | .000    | .000 | .000 | .000             | .000           | .000 | .000  | .000  |
|                    | N               | 2369             | 2239               | 145           | 2363        | 269        | 1199         | 1018               | 1093    | 1091      | 1081    | 2388    | 828       | 1179 | 967    | 406    | 350     | 766  | 467  | 278              | 614            | 504  | 289   | 243   |
| Geography          | Correlation     | .733             | .697               | .649          | .721        | .653       | .720         | .699               | .707    | .690      | .651    | .745    | 1         | .678 | .653   | .606   | .653    | .673 | .515 | .658             | .575           | .639 | .558  | .517  |
|                    | Sig. (2-tailed) | .000             | .000               | .000          | .000        | .000       | .000         | .000               | .000    | .000      | .000    | .000    |           | .000 | .000   | .000   | .000    | .000 | .000 | .000             | .000           | .000 | .000  | .000  |
|                    | N               | 2082             | 1933               | 120           | 2080        | 257        | 1025         | 883                | 987     | 985       | 981     | 828     | 2100      | 953  | 838    | 325    | 299     | 734  | 412  | 254              | 551            | 517  | 195   | 190   |

|                  |                 | English Language | English Literature | Media Studies | Mathematics | Statistics | Science Core | Science Additional | Biology | Chemistry | Physics | History | Geography | RE   | French | German | Spanish | DT   | ICT  | Business Studies | Art and Design | PE   | Drama | Music |
|------------------|-----------------|------------------|--------------------|---------------|-------------|------------|--------------|--------------------|---------|-----------|---------|---------|-----------|------|--------|--------|---------|------|------|------------------|----------------|------|-------|-------|
| RE               | Correlation     | .683             | .638               | .434          | .595        | .614       | .594         | .568               | .620    | .609      | .584    | .689    | .678      | 1    | .584   | .520   | .591    | .591 | .480 | .558             | .491           | .543 | .531  | .555  |
|                  | Sig. (2-tailed) | .000             | .000               | .000          | .000        | .000       | .000         | .000               | .000    | .000      | .000    | .000    | .000      | .000 | .000   | .000   | .000    | .000 | .000 | .000             | .000           | .000 | .000  | .000  |
|                  | N               | 2566             | 2335               | 188           | 2559        | 290        | 1369         | 1145               | 1046    | 1032      | 1035    | 1179    | 953       | 2587 | 930    | 377    | 352     | 992  | 599  | 369              | 751            | 619  | 345   | 273   |
| French           | Correlation     | .666             | .633               | .562          | .643        | .611       | .612         | .651               | .610    | .637      | .615    | .643    | .653      | .584 | 1      | .799   | .776    | .539 | .479 | .607             | .524           | .568 | .401  | .489  |
|                  | Sig. (2-tailed) | .000             | .000               | .000          | .000        | .000       | .000         | .000               | .000    | .000      | .000    | .000    | .000      | .000 | .000   | .000   | .000    | .000 | .000 | .000             | .000           | .000 | .000  | .000  |
|                  | N               | 1884             | 1818               | 109           | 1878        | 236        | 855          | 769                | 989     | 983       | 977     | 967     | 838       | 930  | 1896   | 143    | 202     | 637  | 360  | 240              | 535            | 433  | 241   | 241   |
| German           | Correlation     | .634             | .619               | .559          | .611        | .597       | .540         | .600               | .574    | .544      | .572    | .590    | .606      | .520 | .799   | 1      | .867    | .504 | .450 | .579             | .405           | .448 | .400  | .440  |
|                  | Sig. (2-tailed) | .000             | .000               | .000          | .000        | .000       | .000         | .000               | .000    | .000      | .000    | .000    | .000      | .000 | .000   | .000   | .000    | .000 | .000 | .000             | .000           | .000 | .000  | .000  |
|                  | N               | 780              | 754                | 57            | 783         | 115        | 337          | 296                | 427     | 429       | 428     | 406     | 325       | 377  | 143    | 787    | 45      | 286  | 162  | 104              | 238            | 164  | 85    | 93    |
| Spanish          | Correlation     | .673             | .621               | .382          | .670        | .630       | .613         | .622               | .633    | .616      | .583    | .620    | .653      | .591 | .776   | .867   | 1       | .479 | .343 | .500             | .473           | .474 | .538  | .556  |
|                  | Sig. (2-tailed) | .000             | .000               | .011          | .000        | .000       | .000         | .000               | .000    | .000      | .000    | .000    | .000      | .000 | .000   | .000   | .000    | .000 | .000 | .000             | .000           | .000 | .000  | .000  |
|                  | N               | 731              | 689                | 44            | 727         | 90         | 345          | 305                | 368     | 365       | 366     | 350     | 299       | 352  | 202    | 45     | 735     | 224  | 145  | 102              | 191            | 152  | 88    | 78    |
| DT               | Correlation     | .611             | .599               | .532          | .606        | .605       | .529         | .550               | .535    | .548      | .519    | .610    | .673      | .591 | .539   | .504   | .479    | 1    | .469 | .566             | .525           | .487 | .336  | .335  |
|                  | Sig. (2-tailed) | .000             | .000               | .000          | .000        | .000       | .000         | .000               | .000    | .000      | .000    | .000    | .000      | .000 | .000   | .000   | .000    | .000 | .000 | .000             | .000           | .000 | .000  | .000  |
|                  | N               | 2078             | 1826               | 150           | 2081        | 232        | 1165         | 960                | 773     | 766       | 766     | 766     | 734       | 992  | 637    | 286    | 224     | 2102 | 482  | 293              | 603            | 494  | 194   | 166   |
| ICT              | Correlation     | .496             | .478               | .390          | .545        | .580       | .460         | .444               | .491    | .479      | .469    | .504    | .515      | .480 | .479   | .450   | .343    | .469 | 1    | .452             | .363           | .316 | .428  | .415  |
|                  | Sig. (2-tailed) | .000             | .000               | .000          | .000        | .000       | .000         | .000               | .000    | .000      | .000    | .000    | .000      | .000 | .000   | .000   | .000    | .000 | .000 | .000             | .000           | .000 | .000  | .000  |
|                  | N               | 1166             | 1034               | 104           | 1162        | 168        | 708          | 557                | 426     | 425       | 423     | 467     | 412       | 599  | 360    | 162    | 145     | 482  | 1179 | 203              | 322            | 342  | 163   | 99    |
| Business Studies | Correlation     | .609             | .601               | .537          | .602        | .600       | .629         | .550               | .646    | .612      | .625    | .670    | .658      | .558 | .607   | .579   | .500    | .566 | .452 | 1                | .491           | .567 | .260  | .465  |
|                  | Sig. (2-tailed) | .000             | .000               | .000          | .000        | .000       | .000         | .000               | .000    | .000      | .000    | .000    | .000      | .000 | .000   | .000   | .000    | .000 | .000 | .000             | .000           | .026 | .001  |       |
|                  | N               | 775              | 711                | 71            | 773         | 104        | 444          | 368                | 300     | 298       | 294     | 278     | 254       | 369  | 240    | 104    | 102     | 293  | 203  | 784              | 170            | 73   | 45    |       |
| Art and Design   | Correlation     | .551             | .520               | .439          | .483        | .447       | .422         | .449               | .463    | .471      | .448    | .505    | .575      | .491 | .524   | .405   | .473    | .525 | .363 | .491             | 1              | .387 | .327  | .357  |
|                  | Sig. (2-tailed) | .000             | .000               | .000          | .000        | .000       | .000         | .000               | .000    | .000      | .000    | .000    | .000      | .000 | .000   | .000   | .000    | .000 | .000 | .000             | .000           | .000 | .000  | .000  |
|                  | N               | 1607             | 1436               | 128           | 1606        | 171        | 908          | 733                | 598     | 590       | 585     | 614     | 551       | 751  | 535    | 238    | 191     | 603  | 322  | 170              | 1629           | 280  | 180   | 141   |
| PE               | Correlation     | .546             | .500               | .338          | .577        | .425       | .534         | .523               | .530    | .541      | .558    | .577    | .639      | .543 | .568   | .448   | .474    | .487 | .316 | .567             | .387           | 1    | .383  | .514  |
|                  | Sig. (2-tailed) | .000             | .000               | .001          | .000        | .000       | .000         | .000               | .000    | .000      | .000    | .000    | .000      | .000 | .000   | .000   | .000    | .000 | .000 | .000             | .000           | .000 | .000  | .000  |
|                  | N               | 1325             | 1162               | 96            | 1320        | 157        | 789          | 620                | 470     | 467       | 467     | 504     | 517       | 619  | 433    | 164    | 152     | 494  | 342  | 214              | 280            | 1338 | 129   | 94    |
| Drama            | Correlation     | .563             | .549               | .621          | .423        | .133       | .439         | .428               | .368    | .321      | .354    | .410    | .558      | .531 | .401   | .400   | .538    | .336 | .428 | .260             | .327           | .383 | 1     | .613  |
|                  | Sig. (2-tailed) | .000             | .000               | .000          | .000        | .335       | .000         | .000               | .000    | .000      | .000    | .000    | .000      | .000 | .000   | .000   | .000    | .000 | .000 | .026             | .000           | .000 | .000  | .000  |
|                  | N               | 692              | 631                | 73            | 691         | 55         | 421          | 335                | 228     | 221       | 226     | 289     | 195       | 345  | 241    | 85     | 88      | 194  | 163  | 73               | 180            | 129  | 700   | 86    |
| Music            | Correlation     | .526             | .535               | .674          | .536        | .548       | .468         | .505               | .399    | .402      | .443    | .483    | .517      | .555 | .489   | .440   | .556    | .335 | .415 | .465             | .357           | .514 | .613  | 1     |
|                  | Sig. (2-tailed) | .000             | .000               | .000          | .000        | .000       | .000         | .000               | .000    | .000      | .000    | .000    | .000      | .000 | .000   | .000   | .000    | .000 | .000 | .001             | .000           | .000 | .000  | .000  |
|                  | N               | 562              | 541                | 33            | 567         | 75         | 280          | 243                | 270     | 269       | 269     | 243     | 190       | 273  | 241    | 93     | 78      | 166  | 99   | 45               | 141            | 94   | 86    | 568   |

Note: Blank cells denote results which are incomputable due to lack of data (i.e., between subjects which are mutually exclusive in the GCSE syllabus, or those with very small samples).

**Table S3:** Correlation matrix for subjects included in composites.

|                    |             | English Language | English Literature | Media Studies | Mathematics | Science Core | Science Additional | Biology | Chemistry | Physics | History | RE   | Art and Design | Drama | Music |
|--------------------|-------------|------------------|--------------------|---------------|-------------|--------------|--------------------|---------|-----------|---------|---------|------|----------------|-------|-------|
| English Language   | Correlation | 1                | .800               | .609          | .691        | .659         | .631               | .646    | .633      | .631    | .729    | .683 | .551           | .563  | .526  |
|                    | N           | 5466             | 4791               | 461           | 5398        | 2890         | 2349               | 2159    | 2147      | 2142    | 2369    | 2566 | 1607           | 692   | 562   |
| English Literature | Correlation | .800             | 1                  | .549          | .618        | .601         | .586               | .601    | .599      | .595    | .696    | .638 | .520           | .549  | .535  |
|                    | N           | 4791             | 4832               | 366           | 4775        | 2513         | 2109               | 2065    | 2053      | 2047    | 2239    | 2335 | 1436           | 631   | 541   |
| Media Studies      | Correlation | .609             | .549               | 1             | .508        | .498         | .520               | .539    | .429      | .420    | .591    | .434 | .439           | .621  | .674  |
|                    | N           | 461              | 366                | 467           | 455         | 298          | 239                | 125     | 124       | 124     | 145     | 188  | 128            | 73    | 33    |
| Mathematics        | Correlation | .691             | .618               | .508          | 1           | .752         | .735               | .734    | .763      | .775    | .686    | .595 | .483           | .423  | .536  |
|                    | N           | 5398             | 4775               | 455           | 5461        | 2889         | 2347               | 2157    | 2145      | 2139    | 2363    | 2559 | 1606           | 691   | 567   |
| Science Core       | Correlation | .659             | .601               | .498          | .752        | 1            | .831               |         |           |         | .664    | .594 | .422           | .439  | .468  |
|                    | N           | 2890             | 2513               | 298           | 2889        | 2931         | 2372               |         |           |         | 1199    | 1369 | 908            | 421   | 280   |
| Science Additional | Correlation | .631             | .586               | .520          | .735        | .831         | 1                  |         |           |         | .650    | .568 | .449           | .428  | .505  |
|                    | N           | 2349             | 2109               | 239           | 2347        | 2372         | 2372               |         |           |         | 1018    | 1145 | 733            | 335   | 243   |
| Biology            | Correlation | .646             | .601               | .539          | .734        |              |                    | 1       | .828      | .821    | .678    | .620 | .463           | .368  | .399  |
|                    | N           | 2159             | 2065               | 125           | 2157        |              |                    | 2174    | 2145      | 2137    | 1093    | 1046 | 598            | 228   | 270   |
| Chemistry          | Correlation | .633             | .599               | .429          | .763        |              |                    | .828    | 1         | .834    | .681    | .609 | .471           | .321  | .402  |
|                    | N           | 2147             | 2053               | 124           | 2145        |              |                    | 2145    | 2162      | 2141    | 1091    | 1032 | 590            | 221   | 269   |
| Physics            | Correlation | .631             | .595               | .420          | .775        |              |                    | .821    | .834      | 1       | .673    | .584 | .448           | .354  | .443  |
|                    | N           | 2142             | 2047               | 124           | 2139        |              |                    | 2137    | 2141      | 2157    | 1081    | 1035 | 585            | 226   | 269   |
| History            | Correlation | .729             | .696               | .591          | .686        | .664         | .650               | .678    | .681      | .673    | 1       | .689 | .505           | .410  | .483  |
|                    | N           | 2369             | 2239               | 145           | 2363        | 1199         | 1018               | 1093    | 1091      | 1081    | 2388    | 1179 | 614            | 289   | 243   |
| RE                 | Correlation | .683             | .638               | .434          | .595        | .594         | .568               | .620    | .609      | .584    | .689    | 1    | .491           | .531  | .555  |
|                    | N           | 2566             | 2335               | 188           | 2559        | 1369         | 1145               | 1046    | 1032      | 1035    | 1179    | 2587 | 751            | 345   | 273   |
| Art and Design     | Correlation | .551             | .520               | .439          | .483        | .422         | .449               | .463    | .471      | .448    | .505    | .491 | 1              | .327  | .357  |
|                    | N           | 1607             | 1436               | 128           | 1606        | 908          | 733                | 598     | 590       | 585     | 614     | 751  | 1629           | 180   | 141   |
| Drama              | Correlation | .563             | .549               | .621          | .423        | .439         | .428               | .368    | .321      | .354    | .410    | .531 | .327           | 1     | .613  |
|                    | N           | 692              | 631                | 73            | 691         | 421          | 335                | 228     | 221       | 226     | 289     | 345  | 180            | 700   | 86    |
| Music              | Correlation | .526             | .535               | .674          | .536        | .468         | .505               | .399    | .402      | .443    | .483    | .555 | .357           | .613  | 1     |
|                    | N           | 562              | 541                | 33            | 567         | 280          | 243                | 270     | 269       | 269     | 243     | 273  | 141            | 86    | 568   |

*Note:* This table duplicates relevant correlations from SOM Table 2, for convenience. Mean correlations between the individual subjects included in composites (see SOM Table 1) are as follows:- English: .80, Science: .83, Humanities: .51, Core Subjects: .7. The overall mean correlation (.56) given in the text includes all subjects in the dataset with sufficient sample sizes to analyse (i.e., all subjects listed in SOM Table 2).

**Table S4:** Sex limitation A, C and E estimates (95% confidence intervals).

|                                     | Male                  |                       |                       | Female                |                       |                       |
|-------------------------------------|-----------------------|-----------------------|-----------------------|-----------------------|-----------------------|-----------------------|
|                                     | A                     | C                     | E                     | A                     | C                     | E                     |
| Mean grade for GCSE passes          | 0.57<br>(0.49 - 0.66) | 0.29<br>(0.20 - 0.37) | 0.13<br>(0.12 - 0.15) | 0.47<br>(0.41 - 0.54) | 0.43<br>(0.36 - 0.49) | 0.1<br>(0.09 - 0.11)  |
| Number of GCSE passes at grade A*-C | 0.56<br>(0.47 - 0.66) | 0.26<br>(0.16 - 0.34) | 0.19<br>(0.17 - 0.21) | 0.46<br>(0.39 - 0.54) | 0.38<br>(0.3 - 0.45)  | 0.16<br>(0.15 - 0.18) |
| GCSE English mean grade             | 0.54<br>(0.45 - 0.65) | 0.26<br>(0.16 - 0.35) | 0.20<br>(0.18 - 0.22) | 0.48<br>(0.41 - 0.56) | 0.36<br>(0.28 - 0.43) | 0.16<br>(0.15 - 0.18) |
| GCSE science mean grade             | 0.68<br>(0.58 - 0.80) | 0.13<br>(0.01 - 0.23) | 0.19<br>(0.17 - 0.21) | 0.50<br>(0.42 - 0.59) | 0.33<br>(0.24 - 0.41) | 0.17<br>(0.15 - 0.19) |
| Mathematics                         | 0.57<br>(0.47 - 0.68) | 0.22<br>(0.12 - 0.32) | 0.21<br>(0.19 - 0.23) | 0.54<br>(0.46 - 0.63) | 0.29<br>(0.21 - 0.37) | 0.17<br>(0.15 - 0.18) |
| GCSE core subjects mean grade       | 0.63<br>(0.53 - 0.73) | 0.23<br>(0.12 - 0.32) | 0.15<br>(0.13 - 0.16) | 0.53<br>(0.46 - 0.62) | 0.35<br>(0.27 - 0.43) | 0.11<br>(0.10 - 0.12) |
| GCSE humanities mean grade          | 0.37<br>(0.25 - 0.49) | 0.35<br>(0.23 - 0.45) | 0.28<br>(0.25 - 0.32) | 0.47<br>(0.37 - 0.58) | 0.29<br>(0.19 - 0.39) | 0.23<br>(0.21 - 0.26) |

*Note:* All subjects are composites, except for mathematics (the single GCSE). Heritability is consistently higher for males, and shared environment higher for females – except for the humanities composite, for which this pattern is reversed. For females, heritability is similar (around 50%) for all the subjects and composites assessed. For males, it is more variable, reaching 68% for science (the highest heritability found for any subject), and falling almost in half to 37% for humanities (the lowest found for any subject). However, caution is warranted in interpreting these results, for reasons discussed in the text. In addition, the confidence intervals are quite wide, and often overlapping between males and females.

**Tables S5-S11**

*Note:* These tables present fit indices for sex-limitation sub-model comparisons. All comparisons are made with the full sex-limitation model. The same pattern of results is shown for all variables: significant quantitative but no qualitative sex differences (however, the null model is the most informative in this instance, as discussed in the text). ep = estimated parameters,  $\Delta\chi^2$  = change in chi-square (-2 log-likelihood) between the models,  $\Delta df$  = change in degrees of freedom.

**Table S5:** Sex limitation sub-model comparisons: Mean grade for GCSE passes

| Model                              | ep | $\chi^2$ | df    | AIC       | $\Delta\chi^2$ | $\Delta df$ | p     |
|------------------------------------|----|----------|-------|-----------|----------------|-------------|-------|
| Full sex-limited                   | 9  | 17292.3  | 10965 | -4637.702 | -              | -           | -     |
| Quantitative differences           | 6  | 17352.23 | 10968 | -4583.77  | 59.93          | 3           | < .01 |
| Qualitative differences (fixed rG) | 8  | 17292.3  | 10966 | -4639.702 | 0              | 1           | 1.00  |
| Qualitative differences (fixed rC) | 9  | 17292.3  | 10965 | -4637.702 | 0              | 0           | 1.00  |
| Null model                         | 5  | 17352.23 | 10969 | -4585.77  | 59.93          | 4           | < .01 |

**Table S6:** Sex limitation sub-model comparisons: Number of GCSE passes at grade A\*-C

| Model                              | ep | $\chi^2$ | df    | AIC       | $\Delta\chi^2$ | $\Delta df$ | p     |
|------------------------------------|----|----------|-------|-----------|----------------|-------------|-------|
| Full sex-limited                   | 9  | 18211.53 | 11050 | -3888.469 | -              | -           | -     |
| Quantitative differences           | 6  | 18250.71 | 11053 | -3855.294 | 39.17          | 3           | < .01 |
| Qualitative differences (fixed rG) | 8  | 18211.53 | 11051 | -3890.469 | 0              | 1           | 1.00  |
| Qualitative differences (fixed rC) | 9  | 18211.53 | 11050 | -3888.469 | 0              | 0           | 1.00  |
| Null model                         | 5  | 18250.71 | 11054 | -3857.294 | 39.17          | 4           | < .01 |

**Table S7:** Sex limitation sub-model comparisons: GCSE English mean grade

| Model                              | ep | $\chi^2$ | df    | AIC       | $\Delta\chi^2$ | $\Delta df$ | p     |
|------------------------------------|----|----------|-------|-----------|----------------|-------------|-------|
| Full sex-limited                   | 9  | 18162.12 | 10882 | -3601.883 | -              | -           | -     |
| Quantitative differences           | 6  | 18221.53 | 10885 | -3548.472 | 59.41          | 3           | < .01 |
| Qualitative differences (fixed rG) | 8  | 18162.12 | 10883 | -3603.883 | 0              | 1           | 1.00  |
| Qualitative differences (fixed rC) | 9  | 18162.12 | 10882 | -3601.883 | 0              | 0           | 1.00  |
| Null model                         | 5  | 18221.53 | 10886 | -3550.472 | 59.41          | 4           | < .01 |

**Table S8:** Sex limitation sub-model comparisons: GCSE science mean grade

| Model                              | ep | $\chi^2$ | df    | AIC       | $\Delta\chi^2$ | $\Delta df$ | p    |
|------------------------------------|----|----------|-------|-----------|----------------|-------------|------|
| Full sex-limited                   | 9  | 17123.15 | 10124 | -3124.847 | -              | -           | -    |
| Quantitative differences           | 6  | 17133.86 | 10127 | -3120.136 | 10.71          | 3           | 0.01 |
| Qualitative differences (fixed rG) | 8  | 17123.15 | 10125 | -3126.847 | 0              | 1           | 1.00 |
| Qualitative differences (fixed rC) | 9  | 17123.15 | 10124 | -3124.847 | 0              | 0           | 1.00 |
| Null model                         | 5  | 17133.86 | 10128 | -3122.136 | 10.71          | 4           | 0.03 |

**Table S9:** Sex limitation sub-model comparisons: Mathematics

| Model                              | ep | $\chi^2$ | df    | AIC       | $\Delta\chi^2$ | $\Delta df$ | p     |
|------------------------------------|----|----------|-------|-----------|----------------|-------------|-------|
| Full sex-limited                   | 9  | 18118.01 | 10806 | -3493.987 | -              | -           | -     |
| Quantitative differences           | 6  | 18130.59 | 10809 | -3487.407 | 12.58          | 3           | < .01 |
| Qualitative differences (fixed rG) | 8  | 18118.01 | 10807 | -3495.987 | 0              | 1           | 1.00  |
| Qualitative differences (fixed rC) | 9  | 18118.01 | 10806 | -3493.987 | 0              | 0           | 1.00  |
| Null model                         | 5  | 18130.59 | 10810 | -3489.407 | 12.58          | 4           | 0.01  |

**Table S10:** Sex limitation sub-model comparisons: GCSE core subjects mean grade

| Model                              | ep | $\chi^2$ | df   | AIC       | $\Delta\chi^2$ | $\Delta df$ | p     |
|------------------------------------|----|----------|------|-----------|----------------|-------------|-------|
| Full sex-limited                   | 9  | 16224.42 | 9995 | -3765.582 | -              | -           | -     |
| Quantitative differences           | 6  | 16252.67 | 9998 | -3743.33  | 28.25          | 3           | < .01 |
| Qualitative differences (fixed rG) | 8  | 16224.42 | 9996 | -3767.582 | 0              | 1           | 1.00  |
| Qualitative differences (fixed rC) | 9  | 16224.42 | 9995 | -3765.582 | 0              | 0           | 1.00  |
| Null model                         | 5  | 16252.67 | 9999 | -3745.33  | 28.25          | 4           | < .01 |

**Table S11:** Sex limitation sub-model comparisons: GCSE humanities mean grade

| Model                              | ep | $\chi^2$ | df   | AIC       | $\Delta\chi^2$ | $\Delta df$ | p     |
|------------------------------------|----|----------|------|-----------|----------------|-------------|-------|
| Full sex-limited                   | 9  | 16295.03 | 9314 | -2332.971 | -              | -           | -     |
| Quantitative differences           | 6  | 16358.53 | 9317 | -2275.469 | 63.50          | 3           | < .01 |
| Qualitative differences (fixed rG) | 8  | 16295.03 | 9315 | -2334.971 | 0              | 1           | 1.00  |
| Qualitative differences (fixed rC) | 9  | 16295.03 | 9314 | -2332.971 | 0              | 0           | 1.00  |
| Null model                         | 5  | 16358.53 | 9318 | -2277.469 | 63.50          | 4           | < .01 |
